# Supplementary material
Source: Copernicus journal article supplement (doi:10.5194/egqsj-18-113-1967)

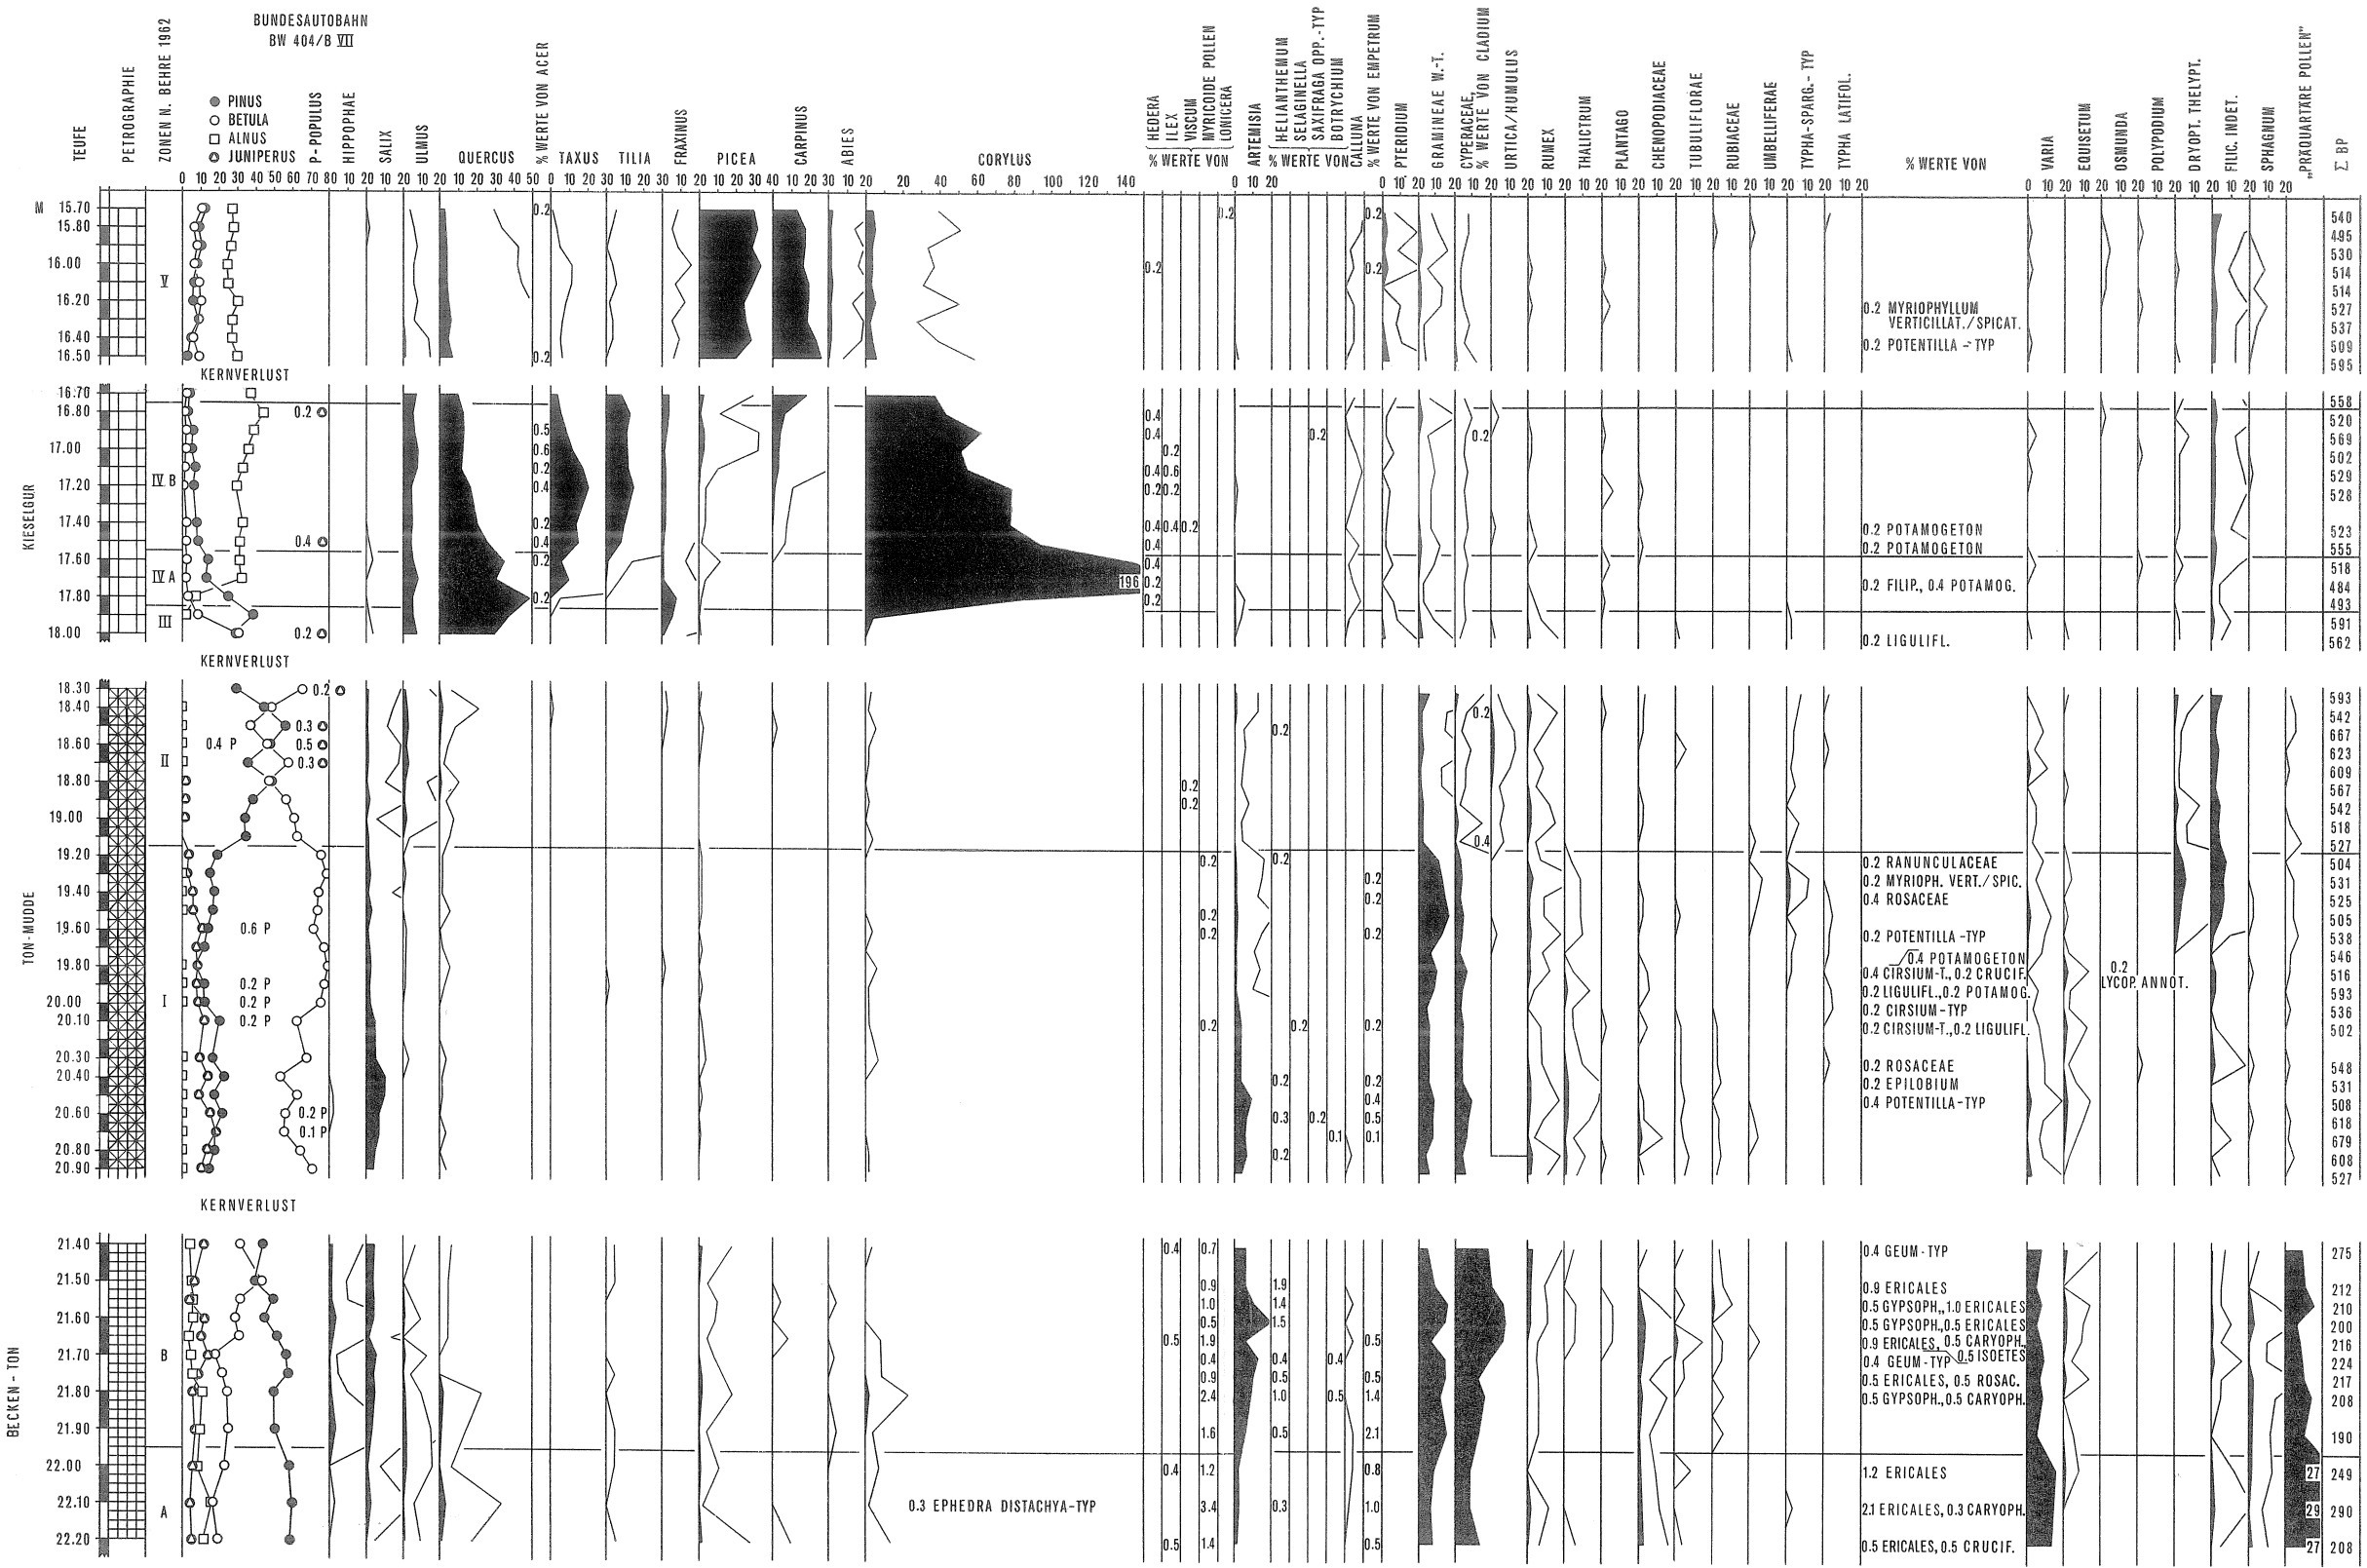

Supplement: Supplementary file 1 [file egqsj-18-113-1967-supplement.zip]

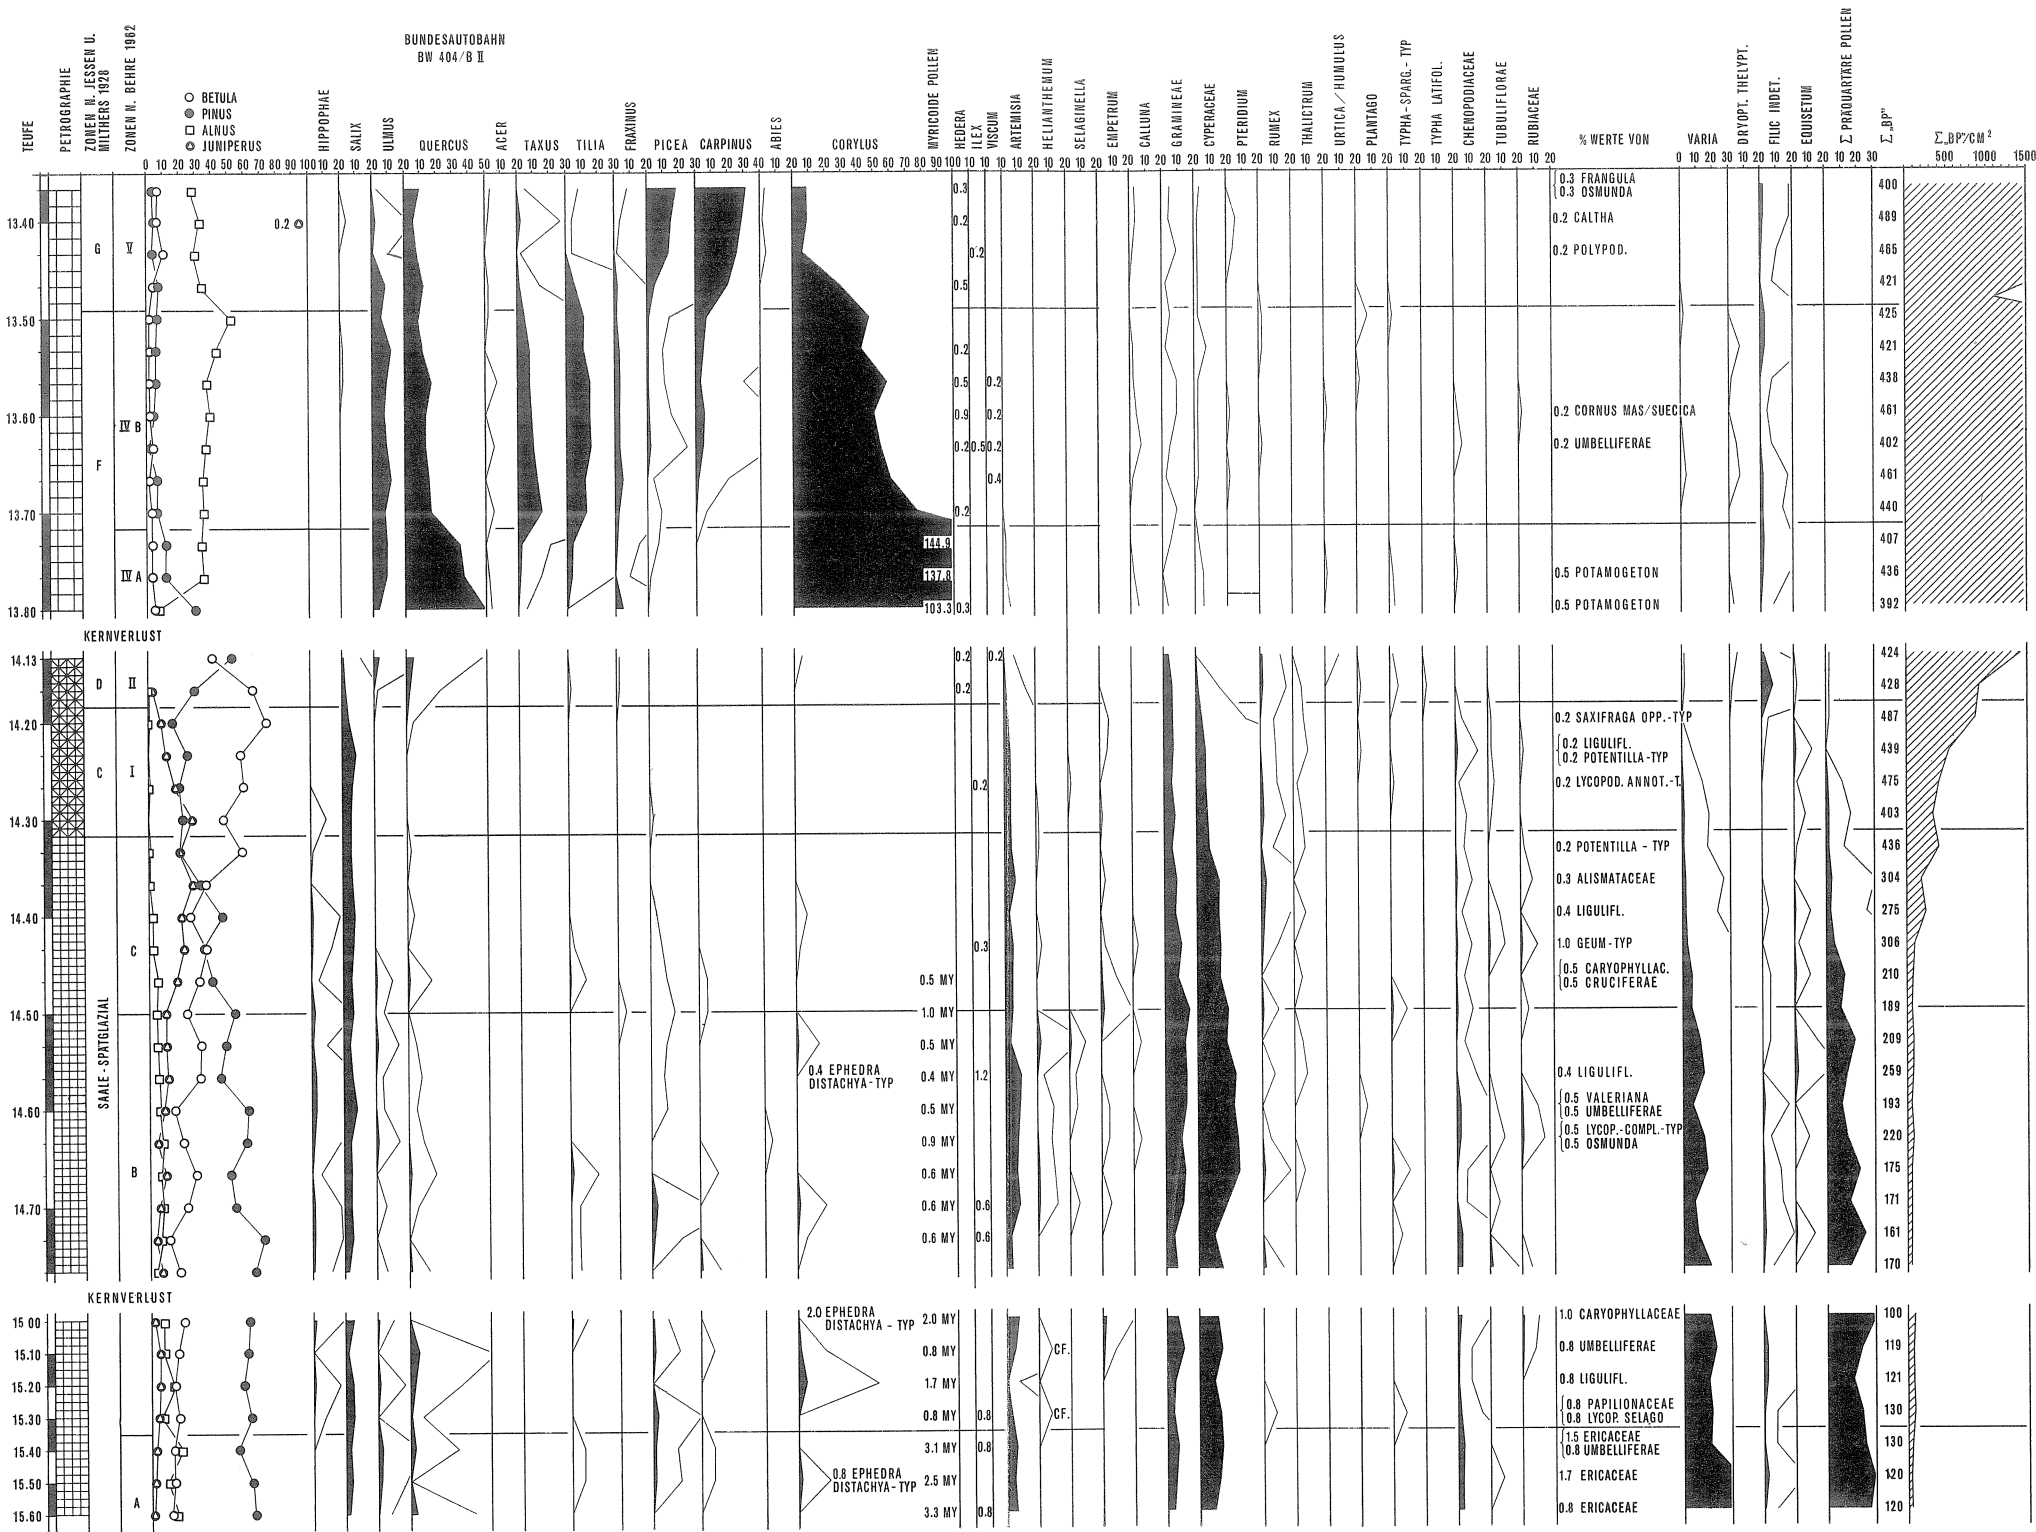

Supplement: Supplementary file 2 [file egqsj-18-113-1967-supplement.zip]
